# Supplementary material
Source: PubMed Central journal article supplement (PMC7416514)
Supplement: NIHMS1604630-supplement-Supplemental_table_1.pdf [file NIHMS1604630-supplement-Supplemental_table_1.pdf]

Supplemental Table 1. Primer sequences for *TP53* sequencing

| Exon | Non M13 Tagged Primers                                | M13 Tagged Primers <sup>a</sup>                                                           |
|------|-------------------------------------------------------|-------------------------------------------------------------------------------------------|
| 2    | F: AGGGTTGGAAGTGTCTCATGC<br>R: AGCCCAACCCTTGTCTTAC    | F: tgtaaaacgacggccagtAGGGTTGGAAGTGTCTCATGC<br>R: caggaaacagctatgaccAGCCCAACCCTTGTCTTAC    |
| 3    | F: CAGTCAGATCCTAGCGTCGAG<br>R: AAATCATCCATTGCTTGGGAC  | F: tgtaaaacgacggccagtCAGTCAGATCCTAGCGTCGAG<br>R: caggaaacagctatgaccAAATCATCCATTGCTTGGGAC  |
| 4    | F: ACGTTCTGGTAAGGACAAGGG<br>R: GAGGAATCCCAAAGTTCCAAAC | F: tgtaaaacgacggccagtACGTTCTGGTAAGGACAAGGG<br>R: caggaaacagctatgaccGAGGAATCCCAAAGTTCCAAAC |
| 5    | F: AAGCTCCTGAGGTGTAGACGC<br>R: GGGCCAGACCTAAGAGCAATC  | F: tgtaaaacgacggccagtAAGCTCCTGAGGTGTAGACGC<br>R: caggaaacagctatgaccGGGCCAGACCTAAGAGCAATC  |
| 6    | F: CTGCTCAGATAGCGATGGTG<br>R: AGGCCCTTAGCCTCTGTAAGC   | F: tgtaaaacgacggccagtCTGCTCAGATAGCGATGGTG<br>R: caggaaacagctatgaccAGGCCCTTAGCCTCTGTAAGC   |
| 7    | F: CATCCTGGCTAACGGTGAAAC<br>R: AGAAATCGGTAAGAGGTGGGC  | F: tgtaaaacgacggccagtCATCCTGGCTAACGGTGAAAC<br>R: caggaaacagctatgaccAGAAATCGGTAAGAGGTGGGC  |
| 8    | F: GTTGGGAGTAGATGGAGCCTG<br>R: TTGGGCAGTGCTAGGAAAGAG  | F: tgtaaaacgacggccagtGTTGGGAGTAGATGGAGCCTG<br>R: caggaaacagctatgaccTTGGGCAGTGCTAGGAAAGAG  |
| 9    | F: GGAGCACTAAGCGAGGTAAGC<br>R: TTGTCTTTGAGGCATCACTGC  | F: tgtaaaacgacggccagtGGAGCACTAAGCGAGGTAAGC<br>R: caggaaacagctatgaccTTGTCTTTGAGGCATCACTGC  |
| 10   | F: ATTGCACCATTGCACTCCC<br>R: AGCTGCCTTTGACCATGAAG     | F: tgtaaaacgacggccagtATTGCACCATTGCACTCCC<br>R: caggaaacagctatgaccAGCTGCCTTTGACCATGAAG     |
| 11   | F: CCATCTTGATTTGAATTCCCG<br>R: ATTGCAAGCAAGGGTTCAAAG  | F: tgtaaaacgacggccagtCCATCTTGATTTGAATTCCCG<br>R: caggaaacagctatgaccATTGCAAGCAAGGGTTCAAAG  |

<sup>a</sup> M13 tag sequence in lower case
