# Supplementary material
Source: PubMed Central journal article supplement (PMC7416514)
Supplement: NIHMS1604630-supplement-Supplemental_table_2.pdf [file NIHMS1604630-supplement-Supplemental_table_2.pdf]

Supplemental Table 2 - Sequencing of *TP53* exons 2-11 in a cohort of resected human brain metastasis specimens from breast cancer patients

| ID# | Exons sequenced <sup>a</sup> |    |                                   |                       |                                                       |                       |    |    |               |    |  |
|-----|------------------------------|----|-----------------------------------|-----------------------|-------------------------------------------------------|-----------------------|----|----|---------------|----|--|
|     | 2                            | 3  | 4                                 | 5                     | 6                                                     | 7                     | 8  | 9  | 10            | 11 |  |
| 1   | WT <sup>b</sup>              | WT | P72R (CCC>CGC)<br>hz <sup>c</sup> | WT                    | WT                                                    | ND <sup>d</sup>       | WT | WT | WT            | WT |  |
| 2   | WT                           | WT | P72R (CCC>CGC)<br>hz              | WT                    | WT                                                    | WT                    | WT | WT | WT            | WT |  |
| 3   | WT                           | WT | P72R (CCC>CGC)<br>ht <sup>e</sup> | WT                    | WT                                                    | WT                    | WT | WT | WT            | WT |  |
| 4   | WT                           | WT | P72R (CCC>CGC)<br>hz              | WT                    | WT                                                    | WT                    | WT | WT | WT            | WT |  |
| 5   | WT                           | WT | P72R (CCC>CGC)<br>ht              | WT                    | WT                                                    | WT                    | WT | WT | WT            | WT |  |
| 7   | WT                           | WT | P72R (CCC>CGC)<br>ht              | K132R (AAG>AGG)<br>ht | WT                                                    | WT                    | WT | WT | WT            | WT |  |
| 8   | WT                           | WT | P72R (CCC>CGC)<br>ht              | WT                    | WT                                                    | WT                    | WT | WT | WT            | WT |  |
| 11  | WT                           | ND | WT                                | WT                    | WT                                                    | WT                    | WT | WT | WT            | WT |  |
| 13  | WT                           | ND | P72R (CCC>CGC)<br>hz              | WT                    | WT                                                    | ND                    | WT | WT | WT            | WT |  |
| 14  | WT                           | WT | P72R (CCC>CGC)<br>hz              | WT                    | WT                                                    | ND                    | WT | WT | WT            | WT |  |
| 15  | WT                           | WT | P72R (CCC>CGC)<br>hz              | L130V<br>(CTC>GTC) ht | WT                                                    | WT                    | WT | WT | WT            | WT |  |
| 16  | WT                           | WT | P72R (CCC>CGC)<br>hz              | WT                    | WT                                                    | WT                    | WT | WT | WT            | WT |  |
| 18  | WT                           | WT | WT                                | WT                    | V203V (GTG>GTS)<br>ht<br>E204*Stop<br>(GAG>TAG)<br>ht | WT                    | WT | WT | WT            | WT |  |
| 19  | WT                           | WT | P72R (CCC>CGC)<br>ht              | WT                    | WT                                                    | WT                    | WT | WT | WT            | WT |  |
| 21  | WT                           | WT | P72R (CCC>CGC)<br>hz              | WT                    | WT                                                    | R248W (CGG>TGG)<br>ht | WT | WT | WT            | WT |  |
| 22  | WT                           | WT | P72R (CCC>CGC)<br>hz              | WT                    | WT                                                    | WT                    | WT | WT | WT            | WT |  |
| 23  | WT                           | WT | P72R (CCC>CGC)<br>hz              | WT                    | WT                                                    | WT                    | WT | WT | WT            | WT |  |
| 24  | WT                           | WT | P72R (CCC>CGC)<br>hz              | WT                    | WT                                                    | WT                    | WT | WT | WT            | WT |  |
| 25  | WT                           | WT | P72R (CCC>CGC)<br>hz              | WT                    | WT                                                    | WT                    | WT | WT | IVS9+<br>insG | WT |  |
| 26  | WT                           | WT | P72R (CCC>CGC)<br>hz              | WT                    | WT                                                    | WT                    | WT | WT | WT            | WT |  |

<sup>a</sup> Assay for research purposes only

<sup>b</sup> WT; wild type sequence was obtained for given exon

<sup>c</sup> hz; sample homozygous for given sequence anomaly

<sup>d</sup> ND; no data obtained at this exon for a given sample

<sup>e</sup> ht; sample heterozygous for given sequence anomaly
